# Supplementary material for: Fast and accurate out-of-core PCA framework for large scale biobank data
Source: HighWire-hosted journal article supplement (doi:10.1101/gr.277525.122), 2023-08-24
Supplement: Supplemental_Table_S7.xlsx [file Supplemental_Table_S7.xlsx]

## Sheet: hg38
Summary of the SNPs with the highest loading of each PC in the UK Biobank data analysis
PC	RsID	Position (GRCh38)	Gene region	Catogory	UCSC Link	Literature
1	rs16891982	chr5:33951588-33951589	SLC45A2	pop structure	UCSC
2	rs16891982	chr5:33951588-33951589	SLC45A2	pop structure	UCSC
3	rs61897270	chr11:55168165-55168166	Centromere; RepeatMasker	Centromere	UCSC
4	rs1133238	chr16:30444137-30444138	SEPHS2	pop structure	UCSC		(keshan disease https://www.malacards.org/card/keshan_disease)
5	rs9268235	chr6:32322431-32322432	TSBP1	HLA	UCSC		https://pubmed.ncbi.nlm.nih.gov/33022050/
6	rs9787740	chr11:50328033-50328034	Centromere; RepeatMasker	Centromere	UCSC
7	rs6928482	chr6:32658472-32658473	HLA	HLA	UCSC
8	rs78938131	chr17:46080256-46080257	KANSL1; Chr17-45585160-INV-706887	Inversion	UCSC	Porubsky et al. 2022
9	rs11514190	chr12:37663537-37663538	Centromere	Centromere	UCSC
10	rs4313581	chr11:50696526-50696527	Centromere	Centromere	UCSC
11	rs13270267	chr8:11587328-11587329	chr8_KZ208915v1_fix; chr8-102880338-INV-757	Inversion	UCSC	Porubsky et al. 2022
12	rs13270267	chr8:11587328-11587329	chr8_KZ208915v1_fix; chr8-102880338-INV-757	Inversion	UCSC	Porubsky et al. 2022
13	rs66525318	chr6:32536359-32536360	HLA	HLA	UCSC
14	rs151284095	chr10:38715635-38715636	Centromere; RepeatMasker	Centromere	UCSC
15	rs147436962	chr11:50724696-50724697	Centromere; RepeatMasker	Centromere	UCSC
16	rs8188005	chr5:50211606-50211607	Centromere; RepeatMasker	Centromere	UCSC
17	rs10400096	chr10:38677014-38677015	Centromere; RepeatMasker	Centromere	UCSC
18	rs9270549	chr6:32592663-32592664	HLA	HLA	UCSC
19	rs9447238	chr6:61600645-61600646	Centromere; RepeatMasker	Centromere	UCSC
20	rs1611637	chr6:29868964-29868965	HLA; RepeatMasker	HLA	UCSC
21	rs115958094	chr19:27515099-27515100	Centromere; RepeatMasker	Centromere	UCSC
22	rs1633066	chr6:29756590-29756591	HLA	HLA	UCSC
23	rs778711	chr7:66386670-66386671	RepeatMasker; Chr7-67019304-INV-851	Inversion	UCSC	Porubsky et al. 2022
24	rs4857154	chr3:95201756-95201757	Centromere; RepeatMasker	Centromere	UCSC
25	rs7747091	chr6:61080498-61080499	Centromere	Centromere	UCSC
26	rs6907552	chr6:61085316-61085317	Centromere	Centromere	UCSC
27	rs1492168	chr3:163215029-163215030	Chr3-162827167-INV-3077	Inversion	UCSC	Porubsky et al. 2022
28	rs10232158	chr7:62671278-62671279	Centromere; RepeatMasker; Chr7-62408487-INV-47959	Centromere	UCSC
29	rs9275334	chr6:32699330-32699331	HLA	HLA	UCSC
30	rs57041609	chr8:46412377-46412378	Centromere; RepeatMasker	Centromere	UCSC
31	rs374942392	chr4:98022116-98022117	STPG2; RepeatMasker		UCSC
32	rs2340580	chr7:57952439-57952440	Centromere; RepeatMasker	Centromere	UCSC
33	rs2343014	chr6:58409700-58409701	Centromere; RepeatMasker	Centromere	UCSC
34	rs28780088	chr6:30146512-30146513	RepeatMasker	HLA	UCSC
35	rs17695238	chr4:143820720-143820721			UCSC
36	rs1951357	chr14:66720883-66720884	GPHN; RepeatMasker		UCSC
37	rs12908585	chr15:24547584-24547585	Chr15-23345460-INV-5044410; Chr15_ML143371v1_fix; RepeatMasker	Inversion	UCSC	Porubsky et al. 2022
38	rs3890049	chr4:119405128-119405129			UCSC
39	rs55773721	chr6:29867569-29867570	HLA; RepeatMasker	HLA	UCSC
40	rs13154165	chr5:46132660-46132661	Centromere; RepeatMasker	Centromere	UCSC
